# Supplementary material
Source: Research Square preprint supplement (doi:10.21203/rs.3.rs-9684388/v1)
Supplement: Supplementary file 1 [file e384cd266ddfaa406f8d5b18.pdf]

## ***Supporting Information***

# **Multireference Investigations of Ethylene Hydrogenation over Bimetallic Catalysts**

Rishu Khurana,<sup>†,‡</sup> Matthew R. Hermes,<sup>†</sup> Valay Agarawal,<sup>†</sup> Christopher Knight,<sup>¶</sup>  
Laura Gagliardi,<sup>†,§</sup> and Cong Liu<sup>\*,‡,§</sup>

<sup>†</sup>*Department of Chemistry, University of Chicago, Chicago, IL 60637, United States*

<sup>‡</sup>*Chemical Sciences and Engineering Division, Argonne National Laboratory, Lemont, IL  
60439, United States*

<sup>¶</sup>*Computational Science Division, Argonne National Laboratory, Lemont, IL 60439, United  
States*

<sup>§</sup>*Pritzker School of Molecular Engineering, University of Chicago, Chicago, IL 60637,  
United States*

E-mail: congliu@anl.gov

## S1 Silsesquioxane (SSQ) as silica support

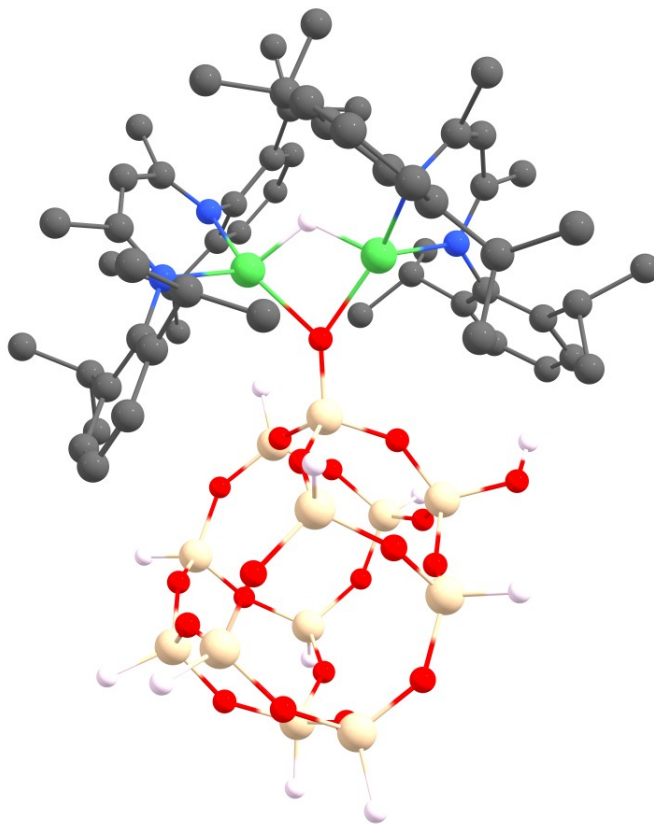

**Figure S1:** The optimized structure of Ni active catalyst on silsesquioxane cage as silica support.

## S2 Natural charge

The NBO analysis was performed to compare the natural charges of the key atoms between the  $\text{Si}(\text{OH})_3\text{O}$  and SSQ models. The calculated natural charges, reported in Table S1, show only minor differences between the two models, supporting the use of the smaller silanol model as a simplified representation of the SSQ-supported catalyst.

**Table S1:** Comparison of natural charges of key atoms demonstrating the electronic similarity between the  $\text{Si}(\text{OH})_3\text{O}$  and SSQ support models.

| Atoms         | $\text{Si}(\text{OH})_3\text{O}$ | SSQ   |
|---------------|----------------------------------|-------|
| $\text{Ni}_1$ | 0.87                             | 0.87  |
| $\text{Ni}_2$ | 0.87                             | 0.87  |
| H             | -0.21                            | -0.17 |
| O-Ni          | -1.24                            | -1.27 |
| Si            | 2.41                             | 2.53  |
| O             | -1.1                             | -1.3  |
| O             | -1.1                             | 1.3   |
| O             | -1.1                             | -1.3  |

### S3 Structure of intermediates and transition states

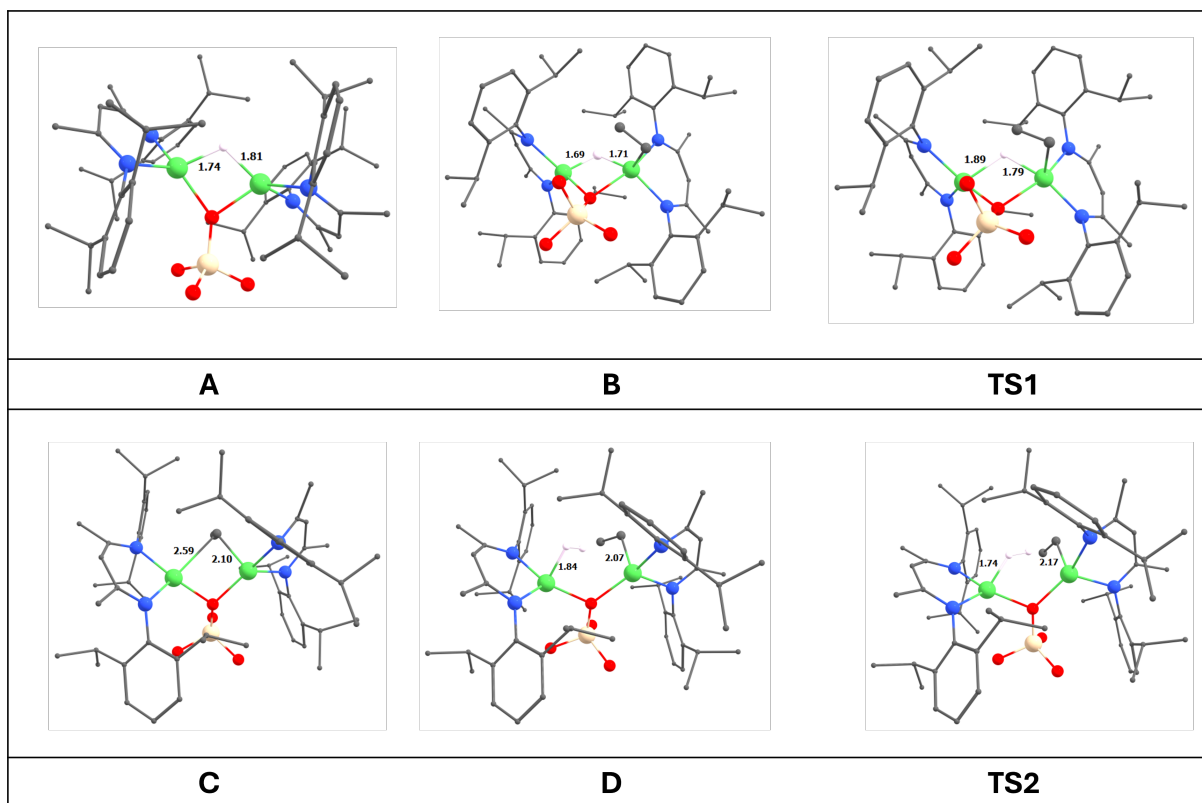

**Figure S2:** Optimized geometries of the intermediates and transition states involved in the catalytic cycle for silica-supported catalyst.

## S4 LASSCF active space size for Fe catalysts

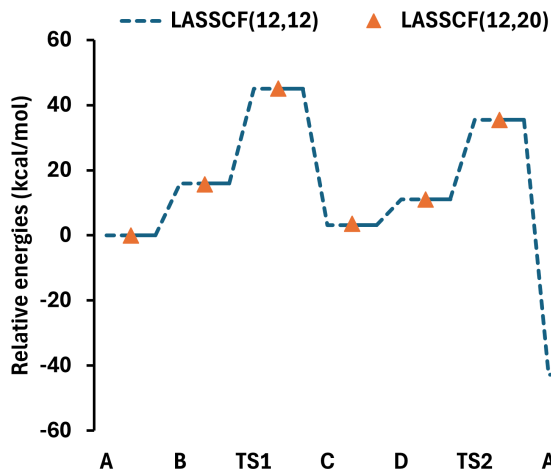

**Figure S3:** Comparison of reaction energy profile for unsupported Fe catalytic systems with LASSCF(12,12) vs LASSCF(12,20) with reduced basis set partition scheme.

## S5 Comparison of MC-PDFT and NEVPT2

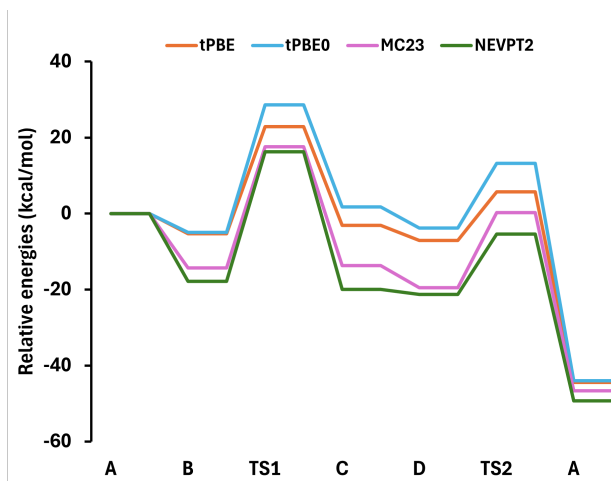

**Figure S4:** Comparison of reaction energy profiles obtained with three on-top MC-PDFT functionals, tPBE, tPBE0, MC23 and NEVPT2 for unsupported Ni catalyst with (4,4) active space and reduced basis set partition scheme.

## S6 Spin-state energetics

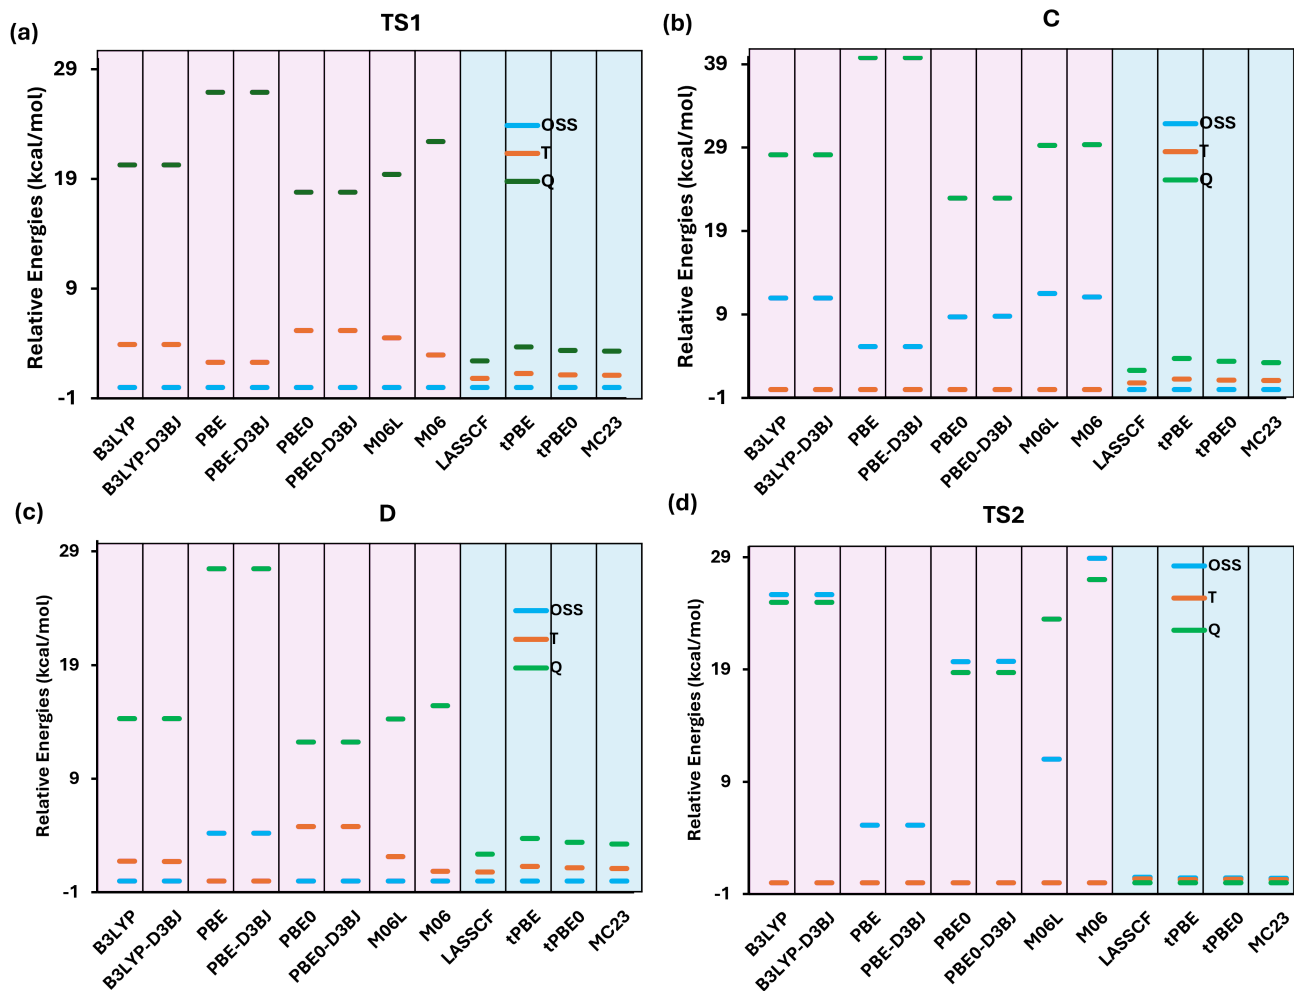

**Figure S5:** Spin-state energetics for intermediates, **C**, **D**, and transition states, **TS1** and **TS2** for unsupported Ni catalyst.

All DFT and multireference (MR) methods consistently predict open-shell singlet ground states for **A**, **TS1**. However, the energy gaps to higher excited states show significant functional dependence in DFT, whereas they remain consistent across different MC-PDFT functionals. For **D**, the ground-spin state from DFT remains Oss with most of the DFT functionals and MR methods, but changes to triplet with PBE and PBE-D3BJ.

For **B**, the ground-spin state analysis from the various methods is discussed in the main

manuscript, and **C** follows a similar trend.

In contrast, **TS2** exhibits markedly different behavior. None of the methods predict an open-shell singlet ground state. DFT methods favor a triplet ground state, while MR approaches predict a quintet ground state, with the triplet and open-shell singlet states lying within 0.5 kcal/mol.

## S7 LASSCF computed barriers with tPBE and tPBE0 on-top functionals.

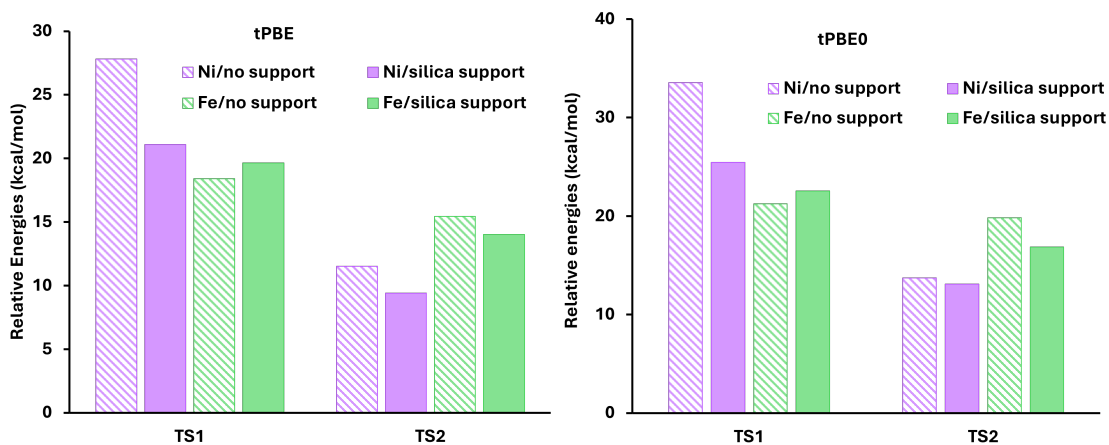

**Figure S6:** Computed transition state barriers (kcal/mol) for the two transition states with (a)tPBE and (b)tPBE0 on-top functionals for all the catalysts.

## S8 CPU and GPU profiling

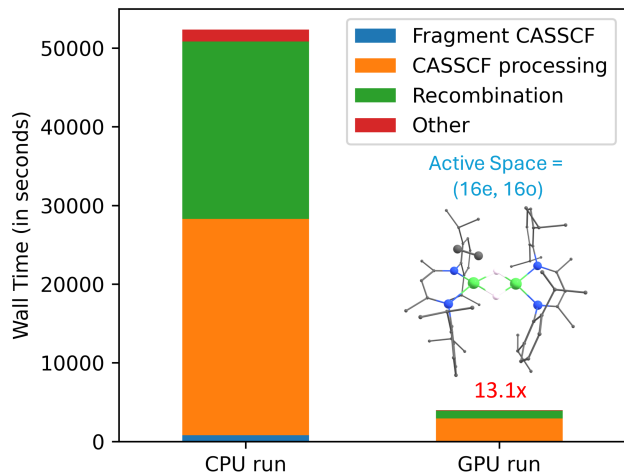

**Figure S7:** Calculation profile of LASSCF for the ethylene-bound species, **B**, of unsupported Ni catalyst with (16e,16o) active space with CPUs and GPUs resource utilization on 8x NVIDIA A100 GPUs on Sophia at ALCF.

## S9 *N*-diagnostic

**Table S2:** *N*-diagnostic for different intermediates and transition states for all the studied catalysts.

|            | Ni/no support | Ni/silica support | Fe/no support | Fe/silica support |
|------------|---------------|-------------------|---------------|-------------------|
| <b>A</b>   | 0.22          | 0.09              | 0.18          | 0.11              |
| <b>B</b>   | 0.17          | 0.12              | 0.17          | 0.11              |
| <b>TS1</b> | 0.19          | 0.12              | 0.15          | 0.10              |
| <b>C</b>   | 0.17          | 0.07              | 0.19          | 0.11              |
| <b>D</b>   | 0.17          | 0.05              | 0.16          | 0.10              |
| <b>TS2</b> | 0.03          | 0.07              | 0.12          | 0.07              |

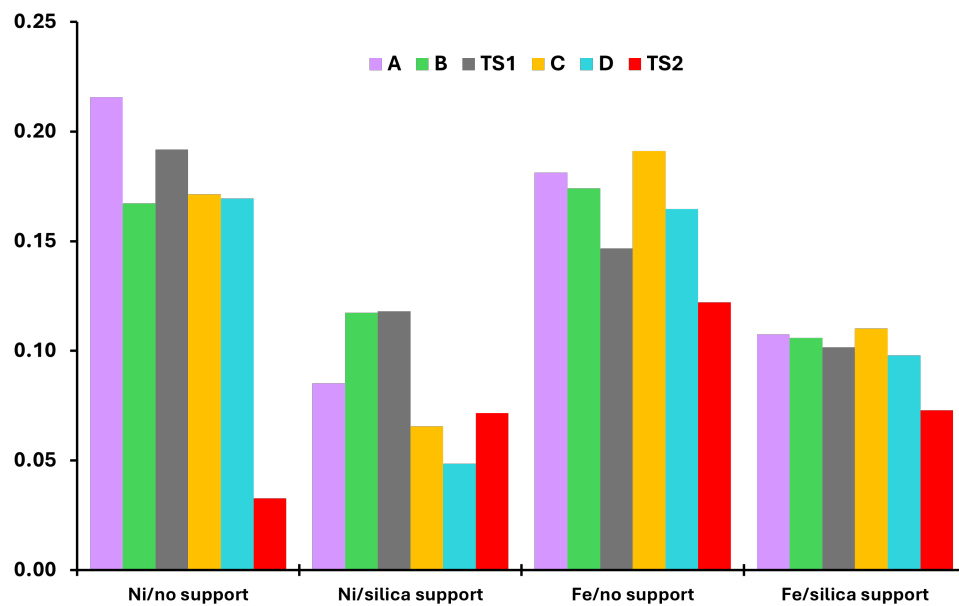

**Figure S8:** *N*-diagnostic for different intermediates and transition states for all the studied catalysts.

## S10 Mulliken Charges

**Table S3:** Mulliken atomic charges on key atoms for all the catalytic systems obtained from MR methods.

|            |            | Ni/<br>no support | Ni/<br>silica support | Fe/<br>no support | Fe/<br>silica support |
|------------|------------|-------------------|-----------------------|-------------------|-----------------------|
| <b>A</b>   | M          | 1.27              | 1.34                  | 1.29              | 1.35                  |
|            | M          | 1.28              | 1.34                  | 1.3               | 1.37                  |
|            | H          | -0.61             | -0.57                 | -0.62             | -0.58                 |
|            | H/O        | -0.63             | -1.18                 | -0.63             | -1.18                 |
|            | O-(Si)     |                   | -0.83                 |                   | -0.83                 |
| <b>B</b>   | M          | 1.24              | 1.33                  | 1.28              | 1.36                  |
|            | M          | 1.25              | 1.34                  | 1.32              | 1.38                  |
|            | H          | -0.59             | -0.59                 | -0.62             | -0.59                 |
|            | H/O        | -0.59             | -1.16                 | -0.63             | -1.16                 |
|            | O-(Si)     |                   | -0.83                 |                   | -0.83                 |
| <b>TS1</b> | M          | 1.28              | 1.35                  | 1.29              | 1.39                  |
|            | M          | 1.29              | 1.37                  | 1.32              | 1.39                  |
|            | H          | -0.37             | -0.4                  | -0.36             | -0.36                 |
|            | H/O        | -0.57             | -1.15                 | -0.52             | -1.16                 |
|            | O-(Si)     |                   | -0.83                 |                   | -0.82                 |
| <b>C</b>   | M          | 1.25              | 1.33                  | 1.29              | 1.38                  |
|            | M          | 1.29              | 1.4                   | 1.31              | 1.39                  |
|            | C of ethyl | -0.77             | -0.74                 | -0.79             | -0.77                 |
|            | H/O        | -0.55             | -1.16                 | -0.57             | -1.16                 |
|            | O-(Si)     |                   | -0.83                 |                   | -0.83                 |
| <b>D</b>   | M          | 1.28              | 1.32                  | 1.3               | 1.39                  |
|            | M          | 1.28              | 1.42                  | 1.31              | 1.4                   |
|            | C of ethyl | -0.78             | -0.71                 | -0.79             | -0.78                 |
|            | H/O        | -0.56             | -1.15                 | -0.57             | -1.16                 |
|            | O-(Si)     |                   | -0.83                 |                   | -0.83                 |
| <b>TS2</b> | M          | 1.27              | 1.38                  | 1.29              | 1.41                  |
|            | M          | 1.3               | 1.38                  | 1.31              | 1.41                  |
|            | C of ethyl | -0.62             | -0.61                 | -0.63             | -0.62                 |
|            | H/O        | -0.58             | -1.16                 | -0.58             | -1.16                 |
|            | O-(Si)     |                   | -0.83                 |                   | -0.83                 |

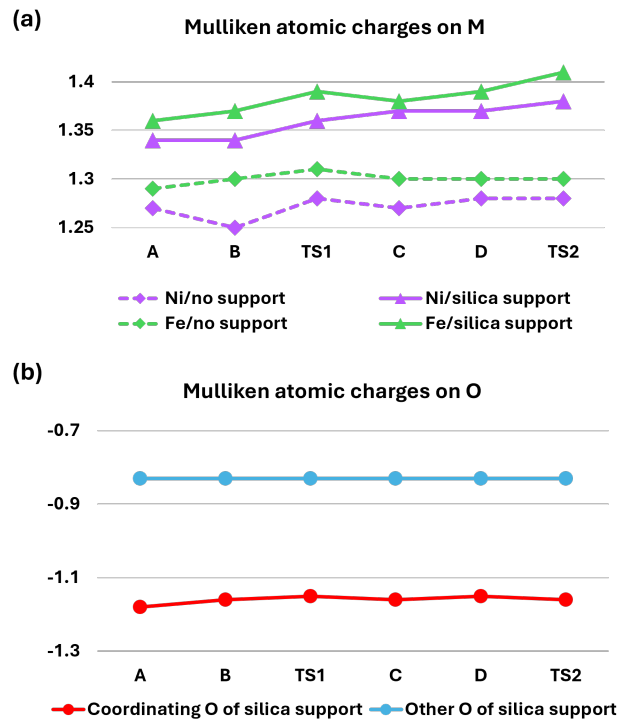

**Figure S9:** Mulliken atomic charges on key atoms for all the catalytic systems obtained from MR methods.

## S11 Electronic Energies

### S11.1 DFT electronic energies for unsupported Ni catalyst.

For **A**, **TS1** and **D**, the ground-state is open-shell singlet while for **B**, **C** and **TS2**, triplet is observed to be the ground state.

**Table S4:** Electronic energies obtained from single-point calculations with different DFT functionals on B3LYP optimized geometries for unsupported Ni catalyst.

|                                   | Spin       | B3LYP        | B3LYP-D3BJ   | M06L         | M06          |
|-----------------------------------|------------|--------------|--------------|--------------|--------------|
| <b>A</b>                          | <b>OSS</b> | -5495.601051 | -5496.016472 | -5497.048432 | -5495.417142 |
|                                   | <b>T</b>   | -5495.592497 | -5496.007916 | -5497.041749 | -5495.410363 |
|                                   | <b>Q</b>   | -5495.571123 | -5495.986543 | -5497.017816 | -5495.385006 |
| <b>B</b>                          | <b>OSS</b> | -5574.136780 | -5574.581268 | 5575.650047  | -5573.966296 |
|                                   | <b>T</b>   | -5574.150462 | -5574.594951 | -5575.662294 | -5573.981489 |
|                                   | <b>Q</b>   | -5574.097891 | -5574.542379 | -5575.611897 | -5573.924889 |
| <b>C</b>                          | <b>OSS</b> | -5574.151842 | -5574.593067 | -5575.663934 | -5573.983864 |
|                                   | <b>T</b>   | -5574.169323 | -5574.610544 | -5575.682325 | -5574.001569 |
|                                   | <b>Q</b>   | -5574.124468 | -5574.565702 | -5575.635693 | -5573.954758 |
| <b>TS1</b>                        | <b>OSS</b> | -5574.131390 | -5574.564225 | -5575.634175 | -5573.949853 |
|                                   | <b>T</b>   | -5574.125181 | -5574.558022 | -5575.626997 | -5573.945138 |
|                                   | <b>Q</b>   | -5574.099082 | -5574.531918 | -5575.603230 | -5573.914151 |
| <b>D</b>                          | <b>OSS</b> | -5575.325186 | -5575.766060 | -5576.835768 | -5575.15222  |
|                                   | <b>T</b>   | -5575.322425 | -5575.763316 | -5576.832348 | -5575.150878 |
|                                   | <b>Q</b>   | -5575.302431 | -5575.743316 | -5576.813069 | -5575.127663 |
| <b>TS2</b>                        | <b>OSS</b> | -5575.281618 | -5575.725264 | -5576.814239 | -5575.106646 |
|                                   | <b>T</b>   | -5575.322512 | -5575.766163 | -5576.831809 | -5575.152734 |
|                                   | <b>Q</b>   | -5575.282697 | -5575.726343 | -5576.794354 | -5575.109663 |
| <b>C<sub>2</sub>H<sub>4</sub></b> |            | -78.565598   | -78.569543   | -78.602199   | -78.547131   |
| <b>C<sub>2</sub>H<sub>6</sub></b> |            | -79.798821   | -79.804234   | -79.844159   | -79.784643   |
| <b>H<sub>2</sub></b>              |            | -1.172897    | -1.173037    | -1.171633    | -1.170551    |

**Table S5:** Electronic energies obtained from single-point calculations with different DFT functionals on B3LYP optimized geometries for unsupported Ni catalyst.

|                                   | Spin       | PBE          | PBE-D3BJ     | PBE0         | PBE0-D3BJ    |
|-----------------------------------|------------|--------------|--------------|--------------|--------------|
| <b>A</b>                          | <b>OSS</b> | -5493.627202 | -5493.883844 | -5493.917303 | -5494.153212 |
|                                   | <b>T</b>   | -5493.625744 | -5493.882383 | -5493.905795 | -5494.141684 |
|                                   | <b>Q</b>   | -5493.57969  | -5493.83616  | -5493.891273 | -5494.127169 |
| <b>B</b>                          | <b>OSS</b> | -5572.11354  | -5572.389206 | -5572.413999 | -5572.667864 |
|                                   | <b>T</b>   | -5572.119628 | -5572.395291 | -5572.421969 | -5572.675835 |
|                                   | <b>Q</b>   | -5572.0479   | -5572.323569 | -5572.379094 | -5572.63296  |
| <b>C</b>                          | <b>OSS</b> | -5572.138019 | -5572.411507 | -5572.432237 | -5572.683717 |
|                                   | <b>T</b>   | -5572.146224 | -5572.419703 | -5572.446114 | -5572.697757 |
|                                   | <b>Q</b>   | -5572.082846 | -5572.356323 | -5572.409519 | -5572.661156 |
| <b>TS1</b>                        | <b>OSS</b> | -5572.110613 | -5572.378562 | -5572.406028 | -5572.652124 |
|                                   | <b>T</b>   | -5572.106971 | -5572.374919 | -5572.397767 | -5572.643852 |
|                                   | <b>Q</b>   | -5572.067757 | -5572.335708 | -5572.37767  | -5572.623762 |
| <b>D</b>                          | <b>OSS</b> | -5573.284381 | -5573.557634 | -5573.602911 | -5573.854069 |
|                                   | <b>T</b>   | -5573.291083 | -5573.56435  | -5573.595273 | -5573.846425 |
|                                   | <b>Q</b>   | -5573.247327 | -5573.520591 | -5573.583422 | -5573.834581 |
| <b>TS2</b>                        | <b>OSS</b> | -5573.289073 | -5573.564389 | -5573.564629 | -5573.818065 |
|                                   | <b>T</b>   | -5573.297263 | -5573.572579 | -5573.596047 | -5573.849508 |
|                                   | <b>Q</b>   | -5573.244516 | -5573.519832 | -5573.566178 | -5573.819648 |
| <b>C<sub>2</sub>H<sub>4</sub></b> |            | -78.50040881 | -78.50252102 | -78.51224421 | -78.51413765 |
| <b>C<sub>2</sub>H<sub>6</sub></b> |            | -79.73098361 | -79.73407977 | -79.75022662 | -79.75284425 |
| <b>H<sub>2</sub></b>              |            | -1.165913725 | -1.165970021 | -1.168216101 | -1.168282736 |

## S11.2 Electronic energies from MR methods

The ground-states are highlighted in gray. All the intermediates and transition states consistently show open-shell singlet for all the catalysts except TS2 for unsupported Ni catalyst that is stabilized in quintet.

**Table S6:** Electronic energies from MR methods for unsupported Ni catalyst.

|                                   | <b>Spin</b> | <b>LASSCF</b> | <b>tPBE</b>  | <b>tPBE0</b> | <b>MC23</b>  |
|-----------------------------------|-------------|---------------|--------------|--------------|--------------|
| <b>A</b>                          | <b>OSS</b>  | -5475.651430  | -5490.722191 | -5486.954501 | -5491.034330 |
|                                   | <b>T</b>    | -5475.649637  | -5490.719375 | -5486.951941 | -5491.031870 |
|                                   | <b>Q</b>    | -5475.646157  | -5490.714024 | -5486.947058 | -5491.027173 |
| <b>B</b>                          | <b>OSS</b>  | -5553.719898  | -5569.210575 | -5565.337905 | -5569.593493 |
|                                   | <b>T</b>    | -5553.718763  | -5569.208730 | -5565.336238 | -5569.591884 |
|                                   | <b>Q</b>    | -5553.716515  | -5569.205143 | -5565.332986 | -5569.588745 |
| <b>C</b>                          | <b>OSS</b>  | -5553.683915  | -5569.204821 | -5565.324595 | -5569.590132 |
|                                   | <b>T</b>    | -5553.682658  | -5569.202783 | -5565.322752 | -5569.588376 |
|                                   | <b>Q</b>    | -5553.680198  | -5569.198852 | -5565.319188 | -5569.584974 |
| <b>D</b>                          | <b>OSS</b>  | -5554.830392  | -5570.374914 | -5566.488783 | -5570.762818 |
|                                   | <b>T</b>    | -5554.829122  | -5570.372889 | -5566.486947 | -5570.761053 |
|                                   | <b>Q</b>    | -5554.826617  | -5570.368969 | -5566.483381 | -5570.757617 |
| <b>TS1</b>                        | <b>OSS</b>  | -5553.639158  | -5569.166241 | -5565.28447  | -5569.542352 |
|                                   | <b>T</b>    | -5553.637869  | -5569.164244 | -5565.282650 | -5569.540567 |
|                                   | <b>Q</b>    | -5553.635333  | -5569.160380 | -5565.279118 | -5569.537099 |
| <b>TS2</b>                        | <b>OSS</b>  | -5554.783183  | -5570.351005 | -5566.459050 | -5570.728315 |
|                                   | <b>T</b>    | -5554.783453  | -5570.351229 | -5566.459285 | -5570.728535 |
|                                   | <b>Q</b>    | -5554.783995  | -5570.351682 | -5566.459760 | -5570.728975 |
| <b>C<sub>2</sub>H<sub>4</sub></b> |             | -78.065121    | -78.484058   | -78.379324   | -78.538811   |
| <b>H2</b>                         |             | -1.132509     | -1.165204    | -1.157030    | -1.165440    |
| <b>C<sub>2</sub>H<sub>4</sub></b> |             | -79.259787    | -79.714171   | -79.600575   | -79.773560   |

**Table S7:** Electronic energies from MR methods for unsupported Fe catalyst.

|            |            | LASSCF       | tPBE         | tPBE0        | MC23         |
|------------|------------|--------------|--------------|--------------|--------------|
| <b>A</b>   | <b>OSS</b> | -4986.718725 | -5001.616108 | -4997.891762 | -5002.214785 |
|            | <b>T</b>   | -4986.718536 | -5001.615743 | -4997.891442 | -5002.214462 |
|            | <b>Q</b>   | -4986.718156 | -5001.615026 | -4997.890809 | -5002.213825 |
|            | <b>S</b>   | -4986.717588 | -5001.613958 | -4997.889866 | -5002.212875 |
|            | <b>N</b>   | -4986.716829 | -5001.612532 | -4997.888606 | -5002.211605 |
| <b>B</b>   | <b>OSS</b> | -5064.757923 | -5080.091665 | -5076.258229 | -5080.757698 |
|            | <b>T</b>   | -5064.757726 | -5080.091295 | -5076.257903 | -5080.757373 |
|            | <b>Q</b>   | -5064.757331 | -5080.090566 | -5076.257257 | -5080.756732 |
|            | <b>S</b>   | -5064.756734 | -5080.089477 | -5076.256291 | -5080.755772 |
|            | <b>N</b>   | -5064.755932 | -5080.088015 | -5076.254994 | -5080.754482 |
| <b>TS1</b> | <b>OSS</b> | -5064.710459 | -5080.062340 | -5076.224369 | -5080.726181 |
|            | <b>T</b>   | -5064.710310 | -5080.062070 | -5076.224130 | -5080.725938 |
|            | <b>Q</b>   | -5064.710011 | -5080.061535 | -5076.223654 | -5080.725454 |
|            | <b>S</b>   | -5064.709554 | -5080.060726 | -5076.222933 | -5080.724722 |
|            | <b>N</b>   | -5064.708930 | -5080.059629 | -5076.221955 | -5080.723728 |
| <b>C</b>   | <b>OSS</b> | -5064.774059 | -5080.110321 | -5076.276256 | -5080.779928 |
|            | <b>T</b>   | -5064.773798 | -5080.109866 | -5076.275849 | -5080.779520 |
|            | <b>Q</b>   | -5064.773277 | -5080.108969 | -5076.275046 | -5080.778712 |
|            | <b>S</b>   | -5064.772495 | -5080.107634 | -5076.273849 | -5080.777508 |
|            | <b>N</b>   | -5064.771454 | -5080.105854 | -5076.272254 | -5080.775902 |
| <b>D</b>   | <b>OSS</b> | -5065.893363 | -5081.267515 | -5077.423977 | -5081.942064 |
|            | <b>T</b>   | -5065.893155 | -5081.267138 | -5077.423642 | -5081.941729 |
|            | <b>Q</b>   | -5065.892735 | -5081.266392 | -5077.422977 | -5081.941062 |
|            | <b>S</b>   | -5065.892097 | -5081.265274 | -5077.42198  | -5081.940061 |
|            | <b>N</b>   | -5065.891231 | -5081.263770 | -5077.420635 | -5081.938712 |
| <b>TS2</b> | <b>OSS</b> | -5065.853994 | -5081.250938 | -5077.401702 | -5081.919384 |
|            | <b>T</b>   | -5065.853976 | -5081.250841 | -5077.401625 | -5081.919297 |
|            | <b>Q</b>   | -5065.853940 | -5081.250652 | -5077.401474 | -5081.919126 |
|            | <b>S</b>   | -5065.853885 | -5081.250370 | -5077.401249 | -5081.918871 |
|            | <b>N</b>   | -5065.853811 | -5081.249994 | -5077.400948 | -5081.918530 |

**Table S8:** Electronic energies from MR methods for silica-supported Ni catalyst.

|            | Spin       | LASSCF       | tPBE         | tPBE0        | MC23         |
|------------|------------|--------------|--------------|--------------|--------------|
| <b>A</b>   | <b>OSS</b> | -6065.647167 | -6082.211245 | -6078.070225 | -6082.632928 |
|            | <b>T</b>   | -6065.647024 | -6082.210966 | -6078.06998  | -6082.632686 |
|            | <b>Q</b>   | -6065.646741 | -6082.210426 | -6078.069505 | -6082.632215 |
| <b>B</b>   | <b>OSS</b> | -6143.699470 | -6160.700504 | -6156.450245 | -6161.197983 |
|            | <b>T</b>   | -6143.698944 | -6160.699654 | -6156.449477 | -6161.197236 |
|            | <b>Q</b>   | -6143.697900 | -6160.697993 | -6156.447970 | -6161.195771 |
| <b>C</b>   | <b>OSS</b> | -6143.695695 | -6160.703055 | -6156.451215 | -6161.198106 |
|            | <b>T</b>   | -6143.695569 | -6160.702837 | -6156.451020 | -6161.197910 |
|            | <b>Q</b>   | -6143.695318 | -6160.702410 | -6156.450637 | -6161.197522 |
| <b>D</b>   | <b>OSS</b> | -6144.803115 | -6161.856249 | -6157.592965 | -6162.342642 |
|            | <b>T</b>   | -6144.803080 | -6161.856174 | -6157.592901 | -6162.342577 |
|            | <b>Q</b>   | -6144.803010 | -6161.856028 | -6157.592774 | -6162.342451 |
| <b>TS1</b> | <b>OSS</b> | -6143.638005 | -6160.666914 | -6156.409687 | -6161.158558 |
|            | <b>T</b>   | -6143.637497 | -6160.666093 | -6156.408944 | -6161.157828 |
|            | <b>Q</b>   | -6143.636488 | -6160.664482 | -6156.407484 | -6161.156393 |
| <b>TS2</b> | <b>OSS</b> | -6144.789686 | -6161.853297 | -6157.587394 | -6162.335516 |
|            | <b>T</b>   | -6144.789543 | -6161.853036 | -6157.587163 | -6162.335288 |
|            | <b>Q</b>   | -6144.789257 | -6161.852522 | -6157.586706 | -6162.334840 |

**Table S9:** Electronic energies from MR methods for silica-supported Fe catalyst.

|            |            | LASSCF       | tPBE         | tPBE0        | MC23         |
|------------|------------|--------------|--------------|--------------|--------------|
| <b>A</b>   | <b>OSS</b> | -5576.715645 | -5593.116551 | -5589.016325 | -5593.822947 |
|            | <b>T</b>   | -5576.715613 | -5593.116433 | -5589.016228 | -5593.822845 |
|            | <b>Q</b>   | -5576.715543 | -5593.116199 | -5589.016035 | -5593.822640 |
|            | <b>S</b>   | -5576.715418 | -5593.115847 | -5589.015739 | -5593.822325 |
|            | <b>N</b>   | -5576.715214 | -5593.115362 | -5589.015325 | -5593.821883 |
| <b>B</b>   | <b>OSS</b> | -5654.756904 | -5671.600536 | -5667.389628 | -5672.379160 |
|            | <b>T</b>   | -5654.756854 | -5671.60041  | -5667.389521 | -5672.379048 |
|            | <b>Q</b>   | -5654.756751 | -5671.600163 | -5667.389310 | -5672.378828 |
|            | <b>S</b>   | -5654.756595 | -5671.599796 | -5667.388995 | -5672.378499 |
|            | <b>N</b>   | -5654.756382 | -5671.599301 | -5667.388572 | -5672.378055 |
| <b>TS1</b> | <b>OSS</b> | -5654.707127 | -5671.569231 | -5667.353705 | -5672.346827 |
|            | <b>T</b>   | -5654.707082 | -5671.569135 | -5667.353622 | -5672.346741 |
|            | <b>Q</b>   | -5654.706992 | -5671.568946 | -5667.353458 | -5672.346570 |
|            | <b>S</b>   | -5654.706856 | -5671.568664 | -5667.353212 | -5672.346314 |
|            | <b>N</b>   | -5654.706670 | -5671.568286 | -5667.352882 | -5672.345970 |
| <b>C</b>   | <b>OSS</b> | -5654.770959 | -5671.613604 | -5667.402943 | -5672.396353 |
|            | <b>T</b>   | -5654.770902 | -5671.613481 | -5667.402837 | -5672.396240 |
|            | <b>Q</b>   | -5654.770789 | -5671.613243 | -5667.402629 | -5672.396019 |
|            | <b>S</b>   | -5654.770618 | -5671.61289  | -5667.402322 | -5672.395691 |
|            | <b>N</b>   | -5654.770388 | -5671.612419 | -5667.401911 | -5672.395251 |
| <b>D</b>   | <b>OSS</b> | -5655.880417 | -5672.758512 | -5668.538989 | -5673.541666 |
|            | <b>T</b>   | -5655.880373 | -5672.758411 | -5668.538902 | -5673.541573 |
|            | <b>Q</b>   | -5655.880283 | -5672.758215 | -5668.538732 | -5673.541391 |
|            | <b>S</b>   | -5655.880147 | -5672.757925 | -5668.53848  | -5673.541121 |
|            | <b>N</b>   | -5655.879966 | -5672.757537 | -5668.538144 | -5673.540759 |
| <b>TS2</b> | <b>OSS</b> | -5655.863000 | -5672.756472 | -5668.533104 | -5673.523400 |
|            | <b>T</b>   | -5655.862986 | -5672.756430 | -5668.533069 | -5673.523363 |
|            | <b>Q</b>   | -5655.862957 | -5672.756349 | -5668.533001 | -5673.523291 |
|            | <b>S</b>   | -5655.862914 | -5672.756229 | -5668.532900 | -5673.523184 |
|            | <b>N</b>   | -5655.862855 | -5672.756068 | -5668.532765 | -5673.523041 |

## S12 Gibbs free energies

**Table S10:** Gibbs free energies for unsupported Ni system computed using different DFT functionals, with thermal corrections taken from B3LYP for consistency across methods (matching the treatment applied to multireference electronic energies).

|                                   | <b>B3LYP</b> | <b>B3LYP-D3BJ</b> | <b>M06L</b>  | <b>M06</b>   |
|-----------------------------------|--------------|-------------------|--------------|--------------|
| <b>A</b>                          | -5494.411586 | -5494.827007      | -5495.858967 | -5494.227677 |
| <b>B</b>                          | -5572.90928  | -5573.353769      | -5574.421112 | -5572.740307 |
| <b>TS1</b>                        | -5572.892268 | -5573.325103      | -5574.395053 | -5572.710731 |
| <b>C</b>                          | -5572.923169 | -5573.36439       | -5574.436171 | -5572.755415 |
| <b>D</b>                          | -5574.06796  | -5574.508834      | -5575.578542 | -5573.894994 |
| <b>TS2</b>                        | -5574.024609 | -5574.468255      | -5575.55723  | -5573.849637 |
| <b>C<sub>2</sub>H<sub>4</sub></b> | -79.74394549 | -79.7493588       | -79.78928326 | -79.72976723 |
| <b>H<sub>2</sub></b>              | -1.173027689 | -1.173168518      | -1.171764458 | -1.170682485 |
| <b>C<sub>2</sub>H<sub>6</sub></b> | -78.53361336 | -78.53755819      | -78.57021382 | -78.51514558 |

**Table S11:** Gibbs free energies for unsupported Ni system computed using different DFT functionals, with thermal corrections taken from B3LYP for consistency across methods (matching the treatment applied to multireference electronic energies).

|                                   | <b>PBE</b>   | <b>PBE-D3BJ</b> | <b>PBE0</b>  | <b>PBE0-D3BJ</b> |
|-----------------------------------|--------------|-----------------|--------------|------------------|
| <b>A</b>                          | -5492.437736 | -5492.694378    | -5492.727838 | -5492.963747     |
| <b>B</b>                          | -5570.878446 | -5571.154109    | -5571.180787 | -5571.434653     |
| <b>TS1</b>                        | -5570.871491 | -5571.139439    | -5571.166906 | -5571.413002     |
| <b>C</b>                          | -5570.90007  | -5571.173549    | -5571.19996  | -5571.451603     |
| <b>D</b>                          | -5572.027155 | -5572.300407    | -5572.345684 | -5572.596843     |
| <b>TS2</b>                        | -5572.032064 | -5572.307379    | -5572.307619 | -5572.561056     |
| <b>C<sub>2</sub>H<sub>4</sub></b> | -79.67610757 | -79.67920373    | -79.69535058 | -79.69796821     |
| <b>H<sub>2</sub></b>              | -1.166044265 | -1.166100561    | -1.168346641 | -1.168413276     |
| <b>C<sub>2</sub>H<sub>6</sub></b> | -78.46842333 | -78.47053554    | -78.48025873 | -78.48215217     |

**Table S12:** Gibbs free energies for different catalytic systems computed using multireference (MR) methods. Thermal contributions are obtained from the DFT B3LYP functional for consistency across methods.

| <b>Gibbs energies (Eh)</b>        |               |              |              |              |
|-----------------------------------|---------------|--------------|--------------|--------------|
| <b>Ni/no support</b>              |               |              |              |              |
|                                   | <b>LASSCF</b> | <b>tPBE</b>  | <b>tPBE0</b> | <b>MC23</b>  |
| <b>A</b>                          | -5474.461965  | -5489.532726 | -5485.765036 | -5489.844864 |
| <b>B</b>                          | -5552.478716  | -5567.969393 | -5564.096723 | -5568.352311 |
| <b>TS1</b>                        | -5552.400036  | -5567.927119 | -5564.045348 | -5568.30323  |
| <b>C</b>                          | -5552.437761  | -5567.958667 | -5564.078441 | -5568.343978 |
| <b>D</b>                          | -5553.573166  | -5569.117687 | -5565.231557 | -5569.505591 |
| <b>TS2</b>                        | -5553.526174  | -5569.093996 | -5565.20204  | -5569.471306 |
| <b>C<sub>2</sub>H<sub>4</sub></b> | -78.033135    | -78.452073   | -78.347338   | -78.506825   |
| <b>C<sub>2</sub>H<sub>6</sub></b> | -79.204911    | -79.659294   | -79.545699   | -79.718684   |
| <b>H<sub>2</sub></b>              | -1.132640     | -1.165334    | -1.157161    | -1.165570    |
| <b>Fe/no support</b>              |               |              |              |              |
| <b>A</b>                          | -4985.532007  | -5000.42939  | -4996.705044 | -5001.028067 |
| <b>B</b>                          | -5063.521563  | -5078.855305 | -5075.021869 | -5079.521338 |
| <b>TS1</b>                        | -5063.472969  | -5078.824850 | -5074.986880 | -5079.488691 |
| <b>C</b>                          | -5063.533367  | -5078.869629 | -5075.035564 | -5079.539236 |
| <b>D</b>                          | -5064.639931  | -5080.014083 | -5076.170545 | -5080.688632 |
| <b>TS2</b>                        | -5064.599551  | -5079.996495 | -5076.147259 | -5080.664941 |
| <b>Ni/silica support</b>          |               |              |              |              |
| <b>A</b>                          | -6064.421929  | -6080.986006 | -6076.844987 | -6081.407689 |
| <b>B</b>                          | -6142.419393  | -6159.420427 | -6155.170168 | -6159.917906 |
| <b>TS1</b>                        | -6142.359498  | -6159.388408 | -6155.131180 | -6159.880051 |
| <b>C</b>                          | -6142.413202  | -6159.420561 | -6155.168721 | -6159.915613 |
| <b>D</b>                          | -6143.507282  | -6160.560415 | -6156.297132 | -6161.046809 |
| <b>TS2</b>                        | -6143.483122  | -6160.546733 | -6156.280831 | -6161.028952 |
| <b>Fe/silica support</b>          |               |              |              |              |
| <b>A</b>                          | -5575.491091  | -5591.891998 | -5587.791771 | -5592.598393 |
| <b>B</b>                          | -5653.480017  | -5670.323649 | -5666.112741 | -5671.102273 |
| <b>TS1</b>                        | -5653.430502  | -5670.292606 | -5666.077080 | -5671.070202 |
| <b>C</b>                          | -5653.490502  | -5670.333146 | -5666.122485 | -5671.115895 |
| <b>D</b>                          | -5654.588230  | -5671.466325 | -5667.246801 | -5672.249478 |
| <b>TS2</b>                        | -5654.570471  | -5671.463943 | -5667.240575 | -5672.230871 |
